# Supplementary material for: Ocrelizumab reduces progression of upper extremity impairment in patients with primary progressive multiple sclerosis: Findings from the phase III randomized ORATORIO trial
Source: PubMed Central journal article supplement — Mult Scler. 2018 Nov 12;24(14):1862–70. doi: 10.1177/1352458518808189 (PMC6282157; doi:10.1177/1352458518808189), 2018-11-12
Supplement: MSJ808189_CONSORT_checklist.pdf [file MSJ808189_CONSORT_checklist.pdf]

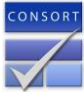

# CONSORT 2010 checklist of information to include when reporting a randomised trial\*

| Section/Topic             | Item No | Checklist item                                                                                                          | Reported on page No                                                                                                                                                                                                                        |
|---------------------------|---------|-------------------------------------------------------------------------------------------------------------------------|--------------------------------------------------------------------------------------------------------------------------------------------------------------------------------------------------------------------------------------------|
| <b>Title and abstract</b> |         |                                                                                                                         |                                                                                                                                                                                                                                            |
|                           | 1a      | Identification as a randomised trial in the title                                                                       | p. 1 (Title)                                                                                                                                                                                                                               |
|                           | 1b      | Structured summary of trial design, methods, results, and conclusions (for specific guidance see CONSORT for abstracts) | p. 2 (Abstract)                                                                                                                                                                                                                            |
| <b>Introduction</b>       |         |                                                                                                                         |                                                                                                                                                                                                                                            |
| Background and objectives | 2a      | Scientific background and explanation of rationale                                                                      | pp.3-4 (Introduction)                                                                                                                                                                                                                      |
|                           | 2b      | Specific objectives or hypotheses                                                                                       | <b>For current analysis:</b> top of p. 4 (last sentence before “Materials and Methods”)<br><b>For ORATORIO trial:</b> Montalban X, et al. New Engl. J Med 2017;376:209-220.                                                                |
| <b>Methods</b>            |         |                                                                                                                         |                                                                                                                                                                                                                                            |
| Trial design              | 3a      | Description of trial design (such as parallel, factorial) including allocation ratio                                    | p. 4 (“Study design and patient population”) &<br>Montalban X, et al. New Engl. J Med 2017;376:209-220                                                                                                                                     |
|                           | 3b      | Important changes to methods after trial commencement (such as eligibility criteria), with reasons                      | ORATORIO trial protocol ( <a href="http://www.nejm.org/doi/suppl/10.1056/NEJMoa1606468/suppl_file/nejmoa1606468_protocol.pdf">http://www.nejm.org/doi/suppl/10.1056/NEJMoa1606468/suppl_file/nejmoa1606468_protocol.pdf</a> ), pp. 371-430 |
| Participants              | 4a      | Eligibility criteria for participants                                                                                   | Montalban X, et al. New Engl. J Med 2017;376:209-220                                                                                                                                                                                       |
|                           | 4b      | Settings and locations where the data were collected                                                                    | Montalban X, et al. New Engl. J Med 2017;376:209-220, Supplementary Appendix                                                                                                                                                               |

|                                  |    |                                                                                                                                                                                             |                                                                                                                                                                                                                                                  |
|----------------------------------|----|---------------------------------------------------------------------------------------------------------------------------------------------------------------------------------------------|--------------------------------------------------------------------------------------------------------------------------------------------------------------------------------------------------------------------------------------------------|
| Interventions                    | 5  | The interventions for each group with sufficient details to allow replication, including how and when they were actually administered                                                       | p.4, "Study design and patient population"                                                                                                                                                                                                       |
| Outcomes                         | 6a | Completely defined pre-specified primary and secondary outcome measures, including how and when they were assessed                                                                          | <b>For current analysis:</b> pp.4-5 ("Nine-Hole Peg Test" and "Statistical Analysis")<br><br><b>For ORATORIO trial:</b> Montalban X, et al. New Engl. J Med 2017;376:209-220                                                                     |
|                                  | 6b | Any changes to trial outcomes after the trial commenced, with reasons                                                                                                                       | ORATORIO trial protocol ( <a href="http://www.nejm.org/doi/suppl/10.1056/NEJMoa1606468/suppl_file/nejmoa1606468_protocol.pdf">http://www.nejm.org/doi/suppl/10.1056/NEJMoa1606468/suppl_file/nejmoa1606468_protocol.pdf</a> ), pp. 371-430       |
| Sample size                      | 7a | How sample size was determined                                                                                                                                                              | Montalban X, et al. New Engl. J Med 2017;376:209-220                                                                                                                                                                                             |
|                                  | 7b | When applicable, explanation of any interim analyses and stopping guidelines                                                                                                                | Not applicable                                                                                                                                                                                                                                   |
| Randomisation:                   |    |                                                                                                                                                                                             |                                                                                                                                                                                                                                                  |
| Sequence generation              | 8a | Method used to generate the random allocation sequence                                                                                                                                      | ORATORIO trial protocol ( <a href="http://www.nejm.org/doi/suppl/10.1056/NEJMoa1606468/suppl_file/nejmoa1606468_protocol.pdf">http://www.nejm.org/doi/suppl/10.1056/NEJMoa1606468/suppl_file/nejmoa1606468_protocol.pdf</a> ), p.43, section 3.1 |
|                                  | 8b | Type of randomisation; details of any restriction (such as blocking and block size)                                                                                                         | ORATORIO trial protocol ( <a href="http://www.nejm.org/doi/suppl/10.1056/NEJMoa1606468/suppl_file/nejmoa1606468_protocol.pdf">http://www.nejm.org/doi/suppl/10.1056/NEJMoa1606468/suppl_file/nejmoa1606468_protocol.pdf</a> ), p.51, section 3.2 |
| Allocation concealment mechanism | 9  | Mechanism used to implement the random allocation sequence (such as sequentially numbered containers), describing any steps taken to conceal the sequence until interventions were assigned | ORATORIO trial protocol ( <a href="http://www.nejm.org/doi/suppl/10.1056/NEJMoa1606468/suppl_file/nejmoa1606468_protocol.pdf">http://www.nejm.org/doi/suppl/10.1056/NEJMoa1606468/suppl_file/nejmoa1606468_protocol.pdf</a> ), p.51, section 3.2 |

|                                                      |     |                                                                                                                                                |                                                                                                                                                                                                                                                                                                              |
|------------------------------------------------------|-----|------------------------------------------------------------------------------------------------------------------------------------------------|--------------------------------------------------------------------------------------------------------------------------------------------------------------------------------------------------------------------------------------------------------------------------------------------------------------|
| Implementation                                       | 10  | Who generated the random allocation sequence, who enrolled participants, and who assigned participants to interventions                        | ORATORIO trial protocol ( <a href="http://www.nejm.org/doi/suppl/10.1056/NEJMoa1606468/suppl_file/nejmoa1606468_protocol.pdf">http://www.nejm.org/doi/suppl/10.1056/NEJMoa1606468/suppl_file/nejmoa1606468_protocol.pdf</a> ), p.51, section 3.2<br><br>Montalban X, et al. New Engl. J Med 2017;376:209-220 |
| Blinding                                             | 11a | If done, who was blinded after assignment to interventions (for example, participants, care providers, those assessing outcomes) and how       | Not applicable                                                                                                                                                                                                                                                                                               |
|                                                      | 11b | If relevant, description of the similarity of interventions                                                                                    | Not relevant                                                                                                                                                                                                                                                                                                 |
| Statistical methods                                  | 12a | Statistical methods used to compare groups for primary and secondary outcomes                                                                  | <b>For current analysis:</b> p.5 (“Statistical Analysis”)<br><br><b>For ORATORIO trial:</b> Montalban X, et al. New Engl. J Med 2017;376:209-220                                                                                                                                                             |
|                                                      | 12b | Methods for additional analyses, such as subgroup analyses and adjusted analyses                                                               | p.5 (“Statistical Analysis” and “Analysis populations”)                                                                                                                                                                                                                                                      |
| <b>Results</b>                                       |     |                                                                                                                                                |                                                                                                                                                                                                                                                                                                              |
| Participant flow (a diagram is strongly recommended) | 13a | For each group, the numbers of participants who were randomly assigned, received intended treatment, and were analysed for the primary outcome | <b>For current analysis:</b> Table 1<br><br><b>For ORATORIO trial:</b> Montalban X, et al. New Engl. J Med 2017;376:209-220 Suppl. Appendix                                                                                                                                                                  |
|                                                      | 13b | For each group, losses and exclusions after randomisation, together with reasons                                                               | Montalban X, et al. New Engl. J Med 2017;376:209-220 Suppl. Appendix                                                                                                                                                                                                                                         |
| Recruitment                                          | 14a | Dates defining the periods of recruitment and follow-up                                                                                        | Montalban X, et al. New Engl. J Med 2017;376:209-220, Suppl. Appendix.                                                                                                                                                                                                                                       |

|                          |     |                                                                                                                                                   |                                                                                      |
|--------------------------|-----|---------------------------------------------------------------------------------------------------------------------------------------------------|--------------------------------------------------------------------------------------|
|                          | 14b | Why the trial ended or was stopped                                                                                                                | Montalban X, et al. New Engl. J Med 2017;376:209-220                                 |
| Baseline data            | 15  | A table showing baseline demographic and clinical characteristics for each group                                                                  | Tables S1 and S2                                                                     |
| Numbers analysed         | 16  | For each group, number of participants (denominator) included in each analysis and whether the analysis was by original assigned groups           | Table 1, 2; Fig 1                                                                    |
| Outcomes and estimation  | 17a | For each primary and secondary outcome, results for each group, and the estimated effect size and its precision (such as 95% confidence interval) | pp.6-7; Table 2; Fig 1, 2, 3, 4, and 5                                               |
|                          | 17b | For binary outcomes, presentation of both absolute and relative effect sizes is recommended                                                       | pp.6-7; Table 2; Fig 1, 2, 3, 4, and 5                                               |
| Ancillary analyses       | 18  | Results of any other analyses performed, including subgroup analyses and adjusted analyses, distinguishing pre-specified from exploratory         | Fig S1                                                                               |
| Harms                    | 19  | All important harms or unintended effects in each group (for specific guidance see CONSORT for harms)                                             | Montalban X, et al. New Engl. J Med 2017;376:209-220, manuscript and suppl. appendix |
| <b>Discussion</b>        |     |                                                                                                                                                   |                                                                                      |
| Limitations              | 20  | Trial limitations, addressing sources of potential bias, imprecision, and, if relevant, multiplicity of analyses                                  | pp.8-9                                                                               |
| Generalisability         | 21  | Generalisability (external validity, applicability) of the trial findings                                                                         | p. 8 (Discussion, 3 <sup>rd</sup> paragraph, last sentence)                          |
| Interpretation           | 22  | Interpretation consistent with results, balancing benefits and harms, and considering other relevant evidence                                     | p. 8 (bottom) through p. 9                                                           |
| <b>Other information</b> |     |                                                                                                                                                   |                                                                                      |
| Registration             | 23  | Registration number and name of trial registry                                                                                                    | p. 3 ("Introduction," third para)                                                    |

|          |    |                                                                                 |                                                                                                                                                                                                   |
|----------|----|---------------------------------------------------------------------------------|---------------------------------------------------------------------------------------------------------------------------------------------------------------------------------------------------|
| Protocol | 24 | Where the full trial protocol can be accessed, if available                     | <a href="http://www.nejm.org/doi/suppl/10.1056/NEJMOA1606468/suppl_file/nejmoa1606468_protocol.pdf">http://www.nejm.org/doi/suppl/10.1056/NEJMOA1606468/suppl_file/nejmoa1606468_protocol.pdf</a> |
| Funding  | 25 | Sources of funding and other support (such as supply of drugs), role of funders | p.10, "Funding"                                                                                                                                                                                   |

\*We strongly recommend reading this statement in conjunction with the CONSORT 2010 Explanation and Elaboration for important clarifications on all the items. If relevant, we also recommend reading CONSORT extensions for cluster randomised trials, non-inferiority and equivalence trials, non-pharmacological treatments, herbal interventions, and pragmatic trials. Additional extensions are forthcoming: for those and for up to date references relevant to this checklist, see [www.consort-statement.org](http://www.consort-statement.org).
